# Supplementary material
Source: PubMed Central journal article supplement (PMC4652096)
Supplement: JCM.02145-15_zjm999094639so1.pdf [file JCM.02145-15_zjm999094639so1.pdf]

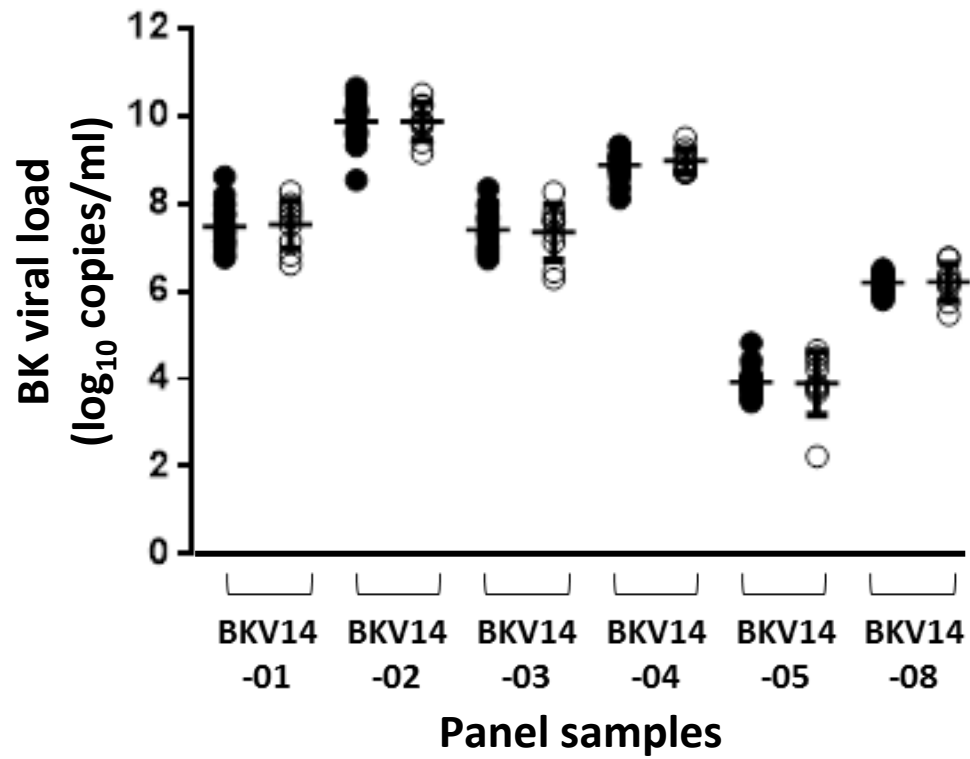

**Figure S1: Comparison of R-gene vs other commercial kits for the 2014 panel.** BK viral load results from R-gene users (n=15) and other commercial kits users (n=8) are presented in filled and blank circles, respectively. No difference was found between these groups ( $p > 0,05$  for each sample, Mann-Whitney test).

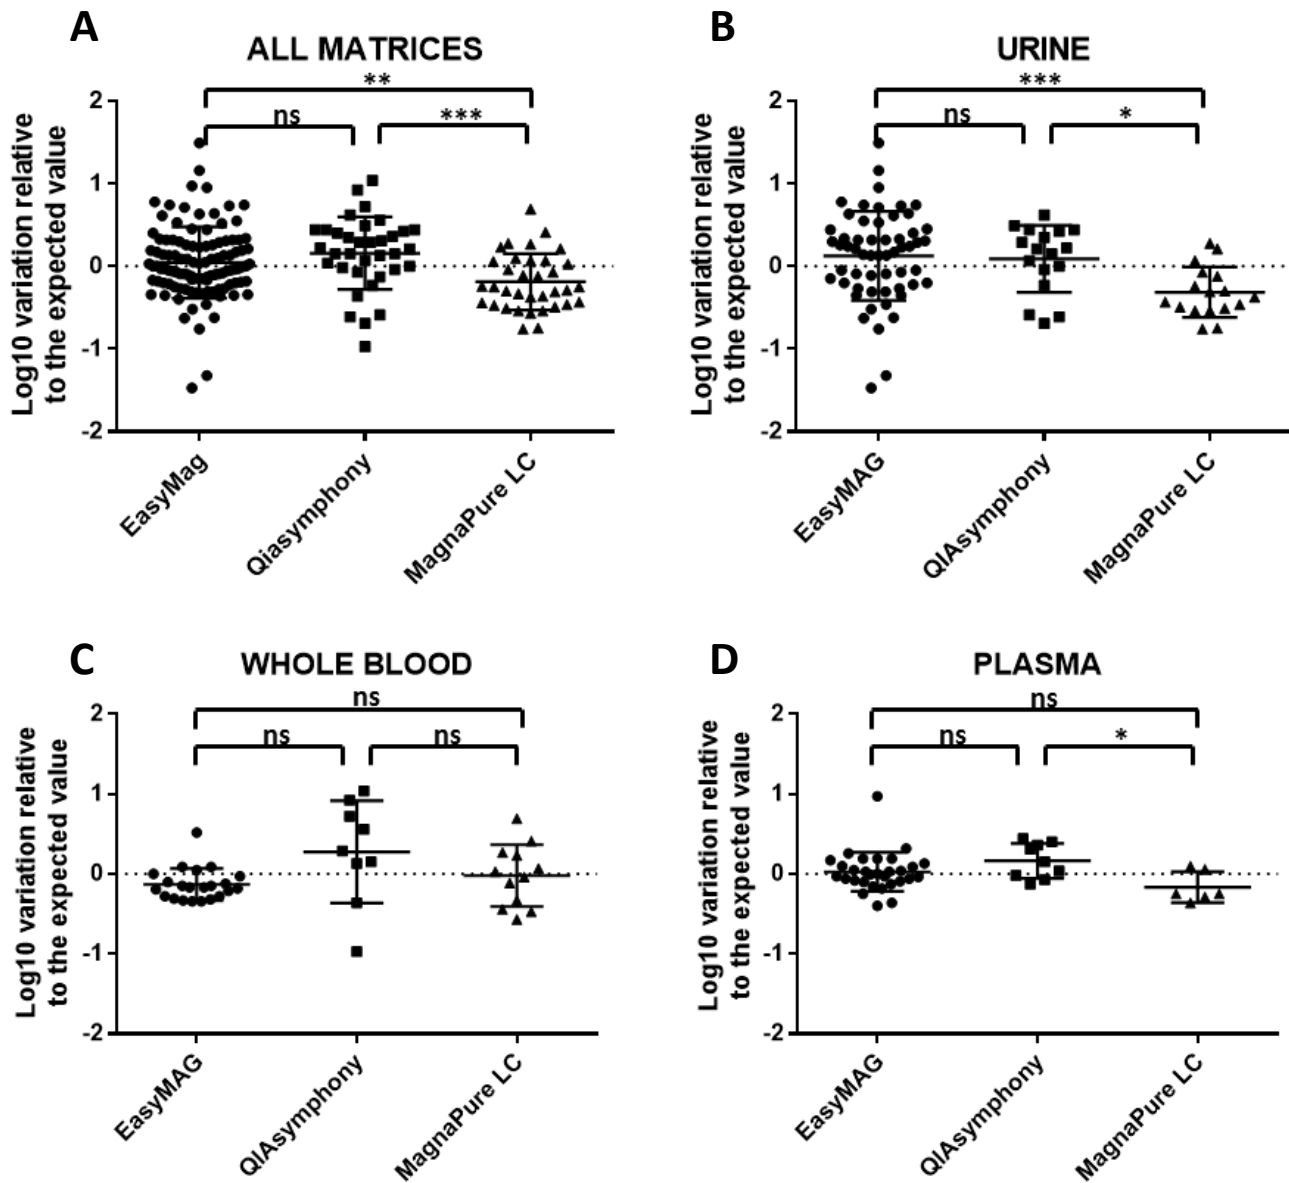

**Figure S2: Comparison of the 3 main extractors for R-gene users.** Log<sub>10</sub> variation in reported results relative to the expected value for each positive sample was calculated. Results from R-gene users in 2013 (n=12) and 2014 (n=15) have been analyzed depending on the extraction method for all matrices (panel A) and for urine, whole blood and plasma samples in panels B, C and D, respectively. The expected value was the geometric mean of the results obtained specifically by R-gene users. The performance of DNA extraction was significantly different between the 3 platforms (p<0.001, Kruskal-Wallis test), especially for urine samples (p=0.02 between MagNA Pure LC and Qiasymphony, p<0.001 between MagNA Pure LC and EasyMAG, Dunn's test). \* stands for p < 0.05, \*\* for p < 0.01, \*\*\* for p < 0.001 and ns for not significant.

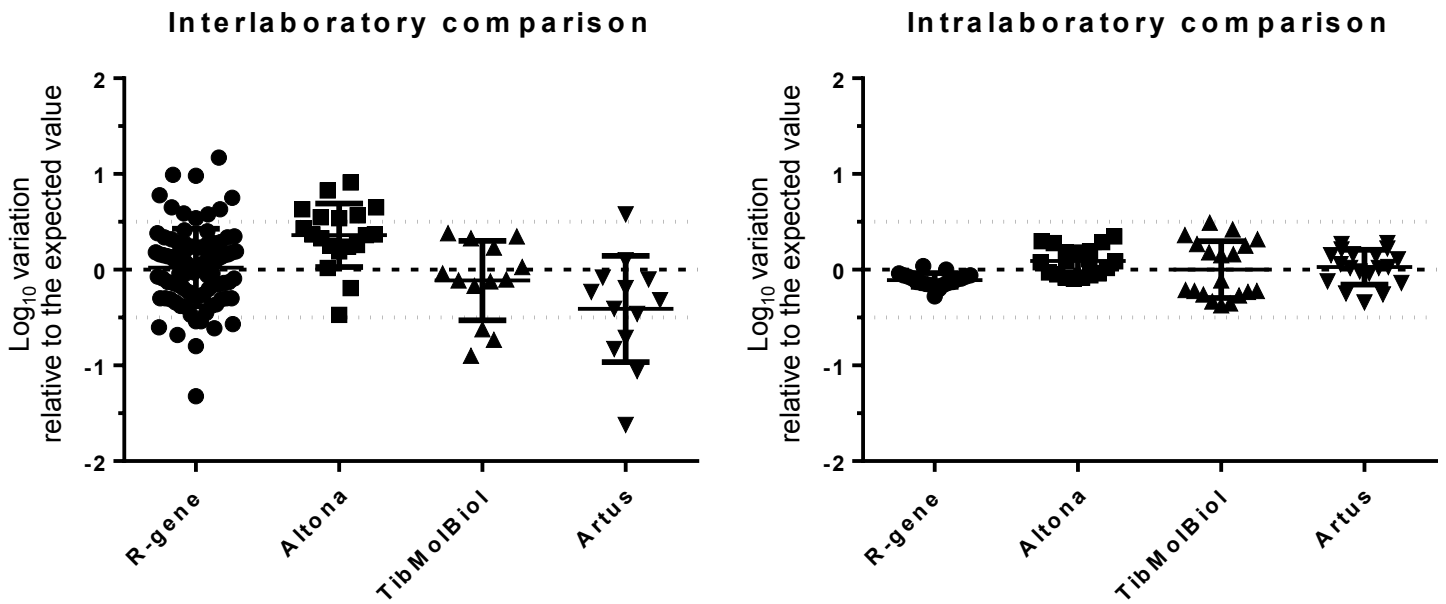

**Figure S3: Interlaboratory and intralaboratory comparison of 4 commercial assays.** Log<sub>10</sub> variation in reported results relative to the expected value was calculated for each positive sample. Dashed lines indicate a difference of  $\pm 0.5 \log_{10}$  compared to the expected value. As for the intralaboratory comparison, DNA was purified using a single extraction platform.

**Table S1:** Target gene, amplicon size, calibrator and quantification range of all assays used by the participants.

| Assay                                               | Target gene     | Amplicon size | Calibrator              | Quantification range <sup>a</sup>                                                                                                |
|-----------------------------------------------------|-----------------|---------------|-------------------------|----------------------------------------------------------------------------------------------------------------------------------|
| RealStar® BKV (Altona Diagnostics/Eurobio)          | <i>LTAg</i>     | -             | Altona <sup>b</sup>     | 1 x 10 <sup>1</sup> - 1 x 10 <sup>10</sup> copies/reaction                                                                       |
| BK Virus R-gene™ (bioMérieux)                       | <i>StAg</i>     | 158 bp        | Argène <sup>b</sup>     | 5 x 10 <sup>1</sup> -2 x 10 <sup>9</sup> copies/reaction                                                                         |
| Artus® BK Virus RG PCR (Qiagen GmbH)                | <i>VP2-VP3</i>  | 274 bp        | Artus <sup>b</sup>      | 5 x 10 <sup>1</sup> - 9.26 x 10 <sup>7</sup> copies/ml in plasma<br>1 x 10 <sup>2</sup> - 1 x 10 <sup>9</sup> copies/ml in urine |
| BKV ELITe MGB® (ELITechGroup Molecular Diagnostics) | <i>LTAg</i>     | -             | ELITe <sup>b</sup>      | 1 x 10 <sup>1</sup> - 1 x 10 <sup>6</sup> copies/reaction                                                                        |
| LightMix® Polyomaviruses JC and BK (TibMolBiol)     | <i>StAg</i>     | 175 bp        | TibMolBiol <sup>b</sup> | 1 x 10 <sup>2</sup> - 1 x 10 <sup>6</sup> copies/reaction                                                                        |
| In-house 1                                          | <i>StAg</i>     | 85 bp         | Vircell <sup>c</sup>    | 3 x 10 <sup>2</sup> - 1 x 10 <sup>10</sup> copies/ml<br>1.7 x 10 <sup>3</sup> – 1.7 x 10 <sup>14</sup> copies/ml                 |
| In-house 2                                          | <i>LTAg</i>     | 173 bp        | ABI <sup>d</sup>        | 5 x 10 <sup>2</sup> - 1 x 10 <sup>10</sup> copies/ml                                                                             |
| In-house 3                                          | <i>VP1</i>      | 182 bp        | pBKV <sup>e</sup>       | 1 x 10 <sup>1</sup> - 1 x 10 <sup>6</sup> copies/reaction                                                                        |
| In-house 4                                          | <i>VP1/StAg</i> | 97/67 bp      | ABI <sup>d</sup>        | 2 x 10 <sup>2</sup> - 2 x 10 <sup>8</sup> copies/ml                                                                              |

<sup>a</sup> Quantification ranges are expressed in copies/reaction or copies/ml as indicated by the participating laboratories.

<sup>b</sup> Constitution of the commercial assays calibrators is proprietary.

<sup>c</sup> Vircell: AmpliRun® BK Virus DNA control (Vircell S.L, Granada, Spain)

<sup>d</sup> ABI: BKVMM Quantitated DNA Control (Advanced Biotechnologies, Columbia, USA)

<sup>e</sup> pBKV: PCR amplification product cloned into a vector

**Table S2:** Details on the extraction platforms, programs and real-time qPCR instruments used by the participants.

| Extraction platforms     |            | Number of users in |      | Extraction kit                              | Initial volume of sample ( $\mu$ l) | Elution volume ( $\mu$ l) | Extraction protocol | Real-time qPCR instruments                                     |
|--------------------------|------------|--------------------|------|---------------------------------------------|-------------------------------------|---------------------------|---------------------|----------------------------------------------------------------|
|                          |            | 2013               | 2014 |                                             |                                     |                           |                     |                                                                |
| EasyMAG <sup>®</sup>     | BioMérieux | 7                  | 11   | NucliSENS <sup>®</sup>                      | 200-500                             | 50-100                    | Specific B          | Mx3005p, Rotorgene, LightCycler 2.0, LightCycler 480, ABI 7500 |
| QIASymphony <sup>®</sup> | Qiagen     | 4                  | 7    | DSP Virus/pathogen mini kit                 | 200                                 | 90                        | na                  | Rotorgene, LightCycler 480, ABI 7500                           |
|                          |            |                    |      | DSP Virus/pathogen midi kit                 | 400-1000                            | 60-140                    |                     |                                                                |
|                          |            |                    |      | DSP DNA mini kit                            | 200                                 | 90-100                    |                     |                                                                |
|                          |            |                    |      | DSP DNA midi kit                            | 400                                 | 110-140                   |                     |                                                                |
| EZ1                      | Qiagen     | 1                  | 3    | EZ1 DSP virus kit                           | 200-300                             | 120                       | na                  | Rotorgene, LightCycler480, CFX and Dx real-time systems        |
|                          |            |                    |      | EZ1 virus mini kit                          | 150-200                             | 90-120                    |                     |                                                                |
| QIAxtractor <sup>®</sup> | Qiagen     | 1                  | 0    | QIAxtractor DX reagents                     | 200                                 | 50                        | na                  | LightCycler 480                                                |
| Biorobot M48             | Qiagen     | 1                  | 0    | na                                          | 200                                 | 100                       | na                  | Rotorgene                                                      |
| MagNA Pure LC            | Roche      | 3                  | 6    | DNA isolation kit High Performance          | 200                                 | 50-100                    | na                  | Rotorgene, Opticon, LightCycler 480, ABI 7500, ABI 7900        |
|                          |            |                    |      | Total Nucleic Acid High Performance         | 200                                 | 100                       |                     |                                                                |
| MagNA Pure 96            | Roche      | 2                  | 2    | DNA and Viral Nucleic Acid Small Volume Kit | 200                                 | 100                       | na                  | LightCycler 2.0, LightCycler 480                               |
| MagNA Pure compact       | Roche      | 1                  | 0    | na                                          | 200                                 | 50-100                    | na                  | ABI 7500                                                       |

na : not available
